# Supplementary material for: Re-evaluation of the Carcinogenic Significance of Hepatitis B Virus Integration in Hepatocarcinogenesis
Source: PLoS One. 2012 Sep 4;7(9):e40363. doi: 10.1371/journal.pone.0040363 (PMC3433482; doi:10.1371/journal.pone.0040363)
Supplement: File S1 — The characteristics of all viral integration sites in 60 HBV positive HCC tissues and adjavent non-tumor tissues. (XLS) [file pone.0040363.s001.xls]

## Sheet: HBV DNA integration sites
File S1. The characteristics of all viral integration sites in 60 HBV positive HCC tissues and adjavent non-tumor tissues
Seq no.	Group	Case No.	Chr. location	Human junction (UCSC, hg 19 database)	Human strand	HBV break point	Virus strand	HBV rearragement	Gene successive to viral junction	Distance	Method
1	Tumor	09H-2	1q25.1	173065047	plus	1825	plus	-	TNFSF18	10-50kb	LM-PCR
2	Tumor	09H-2	1p33	47847259	plus	1818	minus	-	CMPK1	<10kb	Alu-PCR
3	Tumor	09H-4	11q14.1	83163665	minus	1705	plus	-	DLG2	<10kb	Alu-PCR
4	Tumor	09H-6	9p12	43410389	minus	1631	plus	-	-	0-100kb	LM-PCR
5	Tumor	09H-7	8p21.3	9936640	plus	1803	minus	-	MSRA	intron	Alu-PCR
6	Tumor	09H-9	10q23.1	85767043	minus	1860	minus	-	-	0-100kb	Alu-PCR
7	Tumor	09H-10	15q13.3	31673527	plus	1787	plus	-	KLF13	<10kb	LM-PCR
8	Tumor	09H-19	3p22.2	39026094	plus	1877	minus	-	SCN11A	10-50kb	Alu-PCR
9	Tumor	09H-19	11q13.1	64200314	plus	1840	minus	-	MIR1237	50-100kb	Alu-PCR
10	Tumor	09H-19	1p36.11	26089496	minus	1825	minus	-	MAN1C1	exon	Alu-PCR
11	Tumor	09H-21	4p14	35991775	plus	1429	plus	-	ARAP2	50-100kb	Alu-PCR
12	Tumor	09H-23	7q11.23	74614231	plus	1755	plus	-	GTF2IP1	intron	Alu-PCR
13	Tumor	09H-23	5p13.33	1291059	minus	1695	plus	-	TERT	intron	LM-PCR
14	Tumor	09H-23	17p11.2	21536937	minus	1820	plus	Del (1754-1773)	C17orf51	50-100kb	LM-PCR
15	Tumor	09H-23	18q21.31	56110442	plus	1838	minus	-	MIR122	<10kb	Alu-PCR
16	Tumor	09H-27	4q35.2	190666407	plus	1462	plus	-	-	0-100kb	Alu-PCR
17	Tumor	09H-27	10q25.2	114925588	minus	1390	plus	-	TCF7L2	exon	Alu-PCR
18	Tumor	09H-31	7q11.21	74113982	minus	1826	minus	-	GTF2I	intron	Alu-PCR
19	Tumor	09H-31	2p11.2	86622425	minus	1868	minus	Ins (1868-1772) at 1853	KDM3A	10-50kb	Alu-PCR
20	Tumor	09H-32	7p22.1	6955583	plus	1808	plus	-	C7orf28B	50-100kb	Alu-PCR
21	Tumor	09H-38	6q12	67876043	minus	1817	minus	Ins (CACC) at 1825	-	0-100kb	LM-PCR
22	Tumor	09H-40	10q25.1	109468840	minus	1819	plus	-	-	0-100kb	LM-PCR
23	Tumor	09H-42	1p31.3	63211678	plus	1756	plus	-	ATG4C	10-50kb	Alu-PCR
24	Tumor	09H-42	3p26.3	1482111	plus	1820	plus	-	CNTN6	10-50kb	Alu-PCR
25	Tumor	09H-42	3q25	1482107	plus	1820	plus	-	CNTN6	10-50kb	Alu-PCR
26	Tumor	09H-53	17q23.33	47431923	minus	1671	plus	-	ZNF652	intron	Alu-PCR
27	Tumor	09H-53	10q26.11	120628434	plus	1717	plus	-	-	0-100kb	Alu-PCR
28	Tumor	09H-53	5p15.33	1240477	minus	1834	minus	-	SLC6A18	intron	LM-PCR
29	Tumor	09H-57	3q13.31	113632087	plus	1827	plus	-	GRAMD1C	intron	Alu-PCR
30	Tumor	09H-60	9q34.3	139300273	minus	1826	plus	Del (1756-1773 )	SDCCAG3	intron	Alu-PCR
31	Tumor	09H-60	4q13.3	74142783	minus	1824	minus	-	ANKRD17	10-50kb	LM-PCR
32	Tumor	09H-60	15q22.2	60237451	minus	1820	minus	-	FOXB1	50-100kb	LM-PCR
33	Tumor	09H-60	15q25.3	85449263	plus	1712	plus	Ins (AACGCCCACCA) at 1632	SLC28A1	intron	Alu-PCR
34	Tumor	09H-60	2q14.1	116472918	minus	1586	plus	-	DPP10	intron	Alu-PCR
35	Tumor	09H-60	3q26.33	182599673	minus	1827	plus	-	ATP11B	intron	Alu-PCR
36	Tumor	09H-60	1q21.3	154239263	plus	1819	plus	-	UBAP2L	intron	Alu-PCR
37	Tumor	09H-60	Yq11.23	28502748	plus	1819	plus	-	-	0-100kb	Alu-PCR
38	Tumor	09H-60	9p13.3	34295985	minus	1561	minus	-	KIF24	intron	Alu-PCR
39	Tumor	09H-60	4q24	103653592	minus	1826	minus	-	MANBA	intron	Alu-PCR
40	Tumor	09H-60	4q31.3	155171488	minus	1838	minus	-	DCHS2	intron	Alu-PCR
41	Tumor	09H-61	5p13.33	1295758	plus	1822	plus	-	TERT	<10kb	LM-PCR
42	Tumor	09H-62	1p36.23	7735733	plus	1789	plus	-	CAMTA1	intron	LM-PCR
43	Tumor	09H-64	7p11.2	57446860	plus	1818	minus	Ins (1106-1303) & (AAA)13 at 1818	MIR3147	10-50kb	LM-PCR
44	Tumor	09H-64	12p13.31	5951302	minus	1664	minus	Ins (1826-1876) at 1664	ANO2	intron	LM-PCR
45	Tumor	09H-64	9q34.2	136346366	plus	1840	minus	-	SLC2A6	<10kb	Alu-PCR
46	Tumor	09H-64	9q34.3	139846185	minus	1826	minus	-	LCN12	<10kb	Alu-PCR
47	Tumor	09H-64	9q34.3	139845988	minus	1826	minus	-	LCN12	<10kb	Alu-PCR
48	Tumor	09H-64	9q34.2	136346366	plus	1840	minus	-	SLC2A6	<10kb	Alu-PCR
49	Tumor	09H-65	8p12	30611415	plus	546	minus		UBXN8	intron	Alu-PCR
50	Tumor	09H-65	8p12	30614167	minus	1292	minus	Del (1363-1548)	UBXN8	intron	Alu-PCR
51	Tumor	09H-65	14q24.3	76997666	minus	1826	plus	-	ESRRB	10-50kb	LM-PCR
52	Tumor	09H-65	16q24.3	89385728	plus	1837	minus	-	ANKRD11	intron	LM-PCR
53	Tumor	09H-67	Yq11.221	17442168	minus	1633	minus	-	-	0-100kb	LM-PCR
54	Tumor	09H-70	12q24.13	113606808	minus	1321	plus	-	DDX54	intron	Alu-PCR
55	Tumor	09H-70	3q25.31	155498844	minus	1703	plus	-	C3orf33	intron	LM-PCR
56	Tumor	09H-70	14q32.12	92353742	plus	1757	minus	-	FBLN5	intron	Alu-PCR
57	Tumor	09H-70	12q13.13	51565194	minus	1826	minus	-	TFCP2	intron	Alu-PCR
58	Tumor	09H-70	12q24.13	113606823	plus	1832	minus	-	DDX54	intron	Alu-PCR
59	Tumor	09H-73	7p22.1	7212747	plus	1433	plus	-	C1GALT1	<10kb	Alu-PCR
60	Tumor	09H-75	20q13.33	62597547	plus	1679	plus	-	ZNF512B	exon	LM-PCR
61	Tumor	325C	2q35	216251299	minus	1940	plus	Ins (1986- 1936) & (1940-2025) at 1799	FN1	exon	Alu-PCR
62	Tumor	325C	8q24.11	118467464	plus	1783	plus	-	MED30	50-100kb	LM-PCR
63	Tumor	336C	17p11.2	16001031	plus	1818	plus	-	NCOR1	intron	LM-PCR
64	Tumor	337c	14q32.2	92258480	minus	1694	plus	-	TC2N	intron	Alu-PCR
65	Tumor	337c	10p14	7793620	plus	1844	minus	-	KIN	<10kb	LM-PCR
66	Tumor	339C	21q21.1	20990375	minus	1823	minus	-	-	0-100kb	LM-PCR
67	Tumor	339C	17q25.3	79004903	minus	1823	minus	-	FLJ90757	intron	LM-PCR
68	Tumor	339C	3p24.3	21147551	minus	1592	plus	-	-	0-100kb	LM-PCR
69	Tumor	339C	7q36.31	149467090	minus	1654	plus	-	ZNF467	intron	LM-PCR
70	Tumor	351C	5q21.1	99384998	plus	1845	minus	-	-	0-100kb	LM-PCR
71	Tumor	197C	6q21	111413970	minus	1452	plus	-	SLC16A10	intron	Alu-PCR
72	Tumor	197C	1q25.2	178370986	plus	1807	plus	-	RASAL2	intron	LM-PCR
73	Tumor	346C	6p12.3	50309423	minus	1470	minus	-	-	0-100kb	LM-PCR
74	Tumor	432C	11q12.1	61874693	plus	1826	minus	-	-	0-100kb	Alu-PCR
75	Tumor	432C	14q31.3	88387716	minus	1600	minus	Del (1758-1774)	GALC	10-50kb	LM-PCR
76	Tumor	509C	4q23	100227882	plus	1587	plus	-	ADH1B	intron	Alu-PCR
77	Tumor	509C	2q35	216245759	minus	1796	plus	-	FN1	exon	LM-PCR
78	Tumor	571C	14q32.11	91309115	minus	1821	minus	Ins (GTAGACTGAAAAAGTCTAGATT) at 1821	RPS6KA5	10-50kb	Alu-PCR
79	Tumor	571C	19p13.12	14630475	plus	1426	plus	-	TECR	0-10kb	Alu-PCR
80	Tumor	571C	3P21.1	50719003	plus	1819	minus	Ins (1819-1876) at 1845	DOCK3	intron	LM-PCR
81	Tumor	585C	9p21.2	26341802	minus	1826	plus	-	-	0-100kb	LM-PCR
82	Non-tumor	09HP-1	3p21.1	52445738	plus	1694	plus	-	PHF7	intron	Alu-PCR
83	Non-tumor	09HP-1	10p12.2	23408286	plus	1720	plus	-	MSRB2	exon	Alu-PCR
84	Non-tumor	09HP-1	8q23.1	110460652	plus	1791	plus	-	PKHD1L1	intron	Alu-PCR
85	Non-tumor	09HP-2	7p14.1	40234459	minus	1660	minus	-	C7orf10	intron	Alu-PCR
86	Non-tumor	09HP-2	17q25.1	74545780	plus	1805	plus	-	PRCD	<10kb	Alu-PCR
87	Non-tumor	09HP-2	2q37.3	238224722	plus	1836	plus	-	COL6A3	<10kb	LM-PCR
88	Non-tumor	09HP-2	2q35	216271615	minus	1783	plus	-	FN1	intron	LM-PCR
89	Non-tumor	09HP-2	19q13.2	45444905	plus	1817	minus	-	APOC2	<10kb	Alu-PCR
90	Non-tumor	09HP-6	12p12.1	24369511	plus	1825	plus	-	SOX5	intron	Alu-PCR
91	Non-tumor	09HP-7	7q11.23	72974855	plus	1814	plus	-	BCL7B	<10kb	Alu-PCR
92	Non-tumor	09HP-9	10p15.1	5589724	plus	1860	minus	-	CALML3	10-50kb	Alu-PCR
93	Non-tumor	09HP-9	1p36.11	11611521	minus	1860	minus	-	PTCHD2	10-50kb	Alu-PCR
94	Non-tumor	09HP-9	2q35	216255166	minus	1405	plus	-	FN1	intron	Alu-PCR
95	Non-tumor	09HP-9	5p15.2	13953497	plus	1799	plus	-	DNAH5	<10kb	Alu-PCR
96	Non-tumor	09HP-9	12p13.31	7953019	plus	1821	plus	-	NANOG	<10kb	Alu-PCR
97	Non-tumor	09HP-9	1q41	220469814	plus	1768	plus	-	AURKAPS1	10-50kb	Alu-PCR
98	Non-tumor	09HP-9	7q11.21	66054938	plus	1755	plus	-	KCTD7	10-50kb	LM-PCR
99	Non-tumor	09HP-9	4q21.21	81579841	plus	1638	plus	-	C4orf22	intron	LM-PCR
100	Non-tumor	09HP-10	16p13.3	1723992	minus	1738	plus	-	CRAMP1L	exon	LM-PCR
101	Non-tumor	09HP-10	7p21.1	17031634	plus	1818	minus	-	-	0-100kb	Alu-PCR
102	Non-tumor	09HP-10	2q34	216289986	plus	1821	minus	-	FN1	exon	Alu-PCR
103	Non-tumor	09HP-12	3p26.3	172232	plus	1713	plus	-	CHL1	50-100kb	Alu-PCR
104	Non-tumor	09HP-12	5p13.2	37269830	plus	1810	plus	-	C5orf42	10-50kb	Alu-PCR
105	Non-tumor	09HP-12	18q22.1	64028253	plus	1886	minus	-	-	0-100kb	Alu-PCR
106	Non-tumor	09HP-12	12q13.13	53412457	minus	1826	minus	-	EIF4B	intron	Alu-PCR
107	Non-tumor	09HP-23	Xp11.22	50096733	plus	1830	minus	-	CCNB3	<10kb	LM-PCR
108	Non-tumor	09HP-23	9p13.3	34876708	plus	1825	plus	-	C9orf144	10-50kb	Alu-PCR
109	Non-tumor	09HP-23	9p21.1	32971338	plus	1827	plus	Del (1758-1777)	APTX	<10kb	Alu-PCR
110	Non-tumor	09HP-27	6q25.1	151657080	plus	1809	plus	-	AKAP12	intron	Alu-PCR
111	Non-tumor	09HP-27	2q35	216273916	minus	1786	plus	-	FN1	intron	LM-PCR
112	Non-tumor	09HP-27	Xq21.33	97003229	minus	1823	minus	-	-	0-100kb	Alu-PCR
113	Non-tumor	09HP-27	9q33.2	125568587	plus	1818	minus	-	OR1K1	<10kb	Alu-PCR
114	Non-tumor	09HP-31	13q34	113920105	minus	1822	minus	-	CUL4A	<10kb	Alu-PCR
115	Non-tumor	09HP-32	2q34	216269562	plus	1818	minus	-	FN1	intron	Alu-PCR
116	Non-tumor	09HP-32	1p13.3	111502839	minus	1797	minus	-	C1orf103	intron	LM-PCR
117	Non-tumor	09HP-34	14q32.33	107050990	minus	1825	minus	-	NCRNA00221	50-100kb	LM-PCR
118	Non-tumor	09HP-34	1p31.3	71520087	plus	1834	minus	-	PTGER3	<10kb	LM-PCR
119	Non-tumor	09HP-34	7q34	142839619	minus	1753	plus	-	PIP	<10kb	Alu-PCR
120	Non-tumor	09HP-34	20q11.23	35404826	plus	1811	plus	-	DSN1	<10kb	Alu-PCR
121	Non-tumor	09HP-34	10q21.3	65030193	minus	1782	plus	-	JMJD1C	intron	Alu-PCR
122	Non-tumor	09HP-34	4q33	171763477	minus	1821	plus	-	-	0-100kb	Alu-PCR
123	Non-tumor	09HP-42	17q25.3	80032811	minus	1807	plus	-	FASN	<10kb	Alu-PCR
124	Non-tumor	09HP-42	14q21.2	46558776	minus	1807	minus	-	-	0-100kb	LM-PCR
125	Non-tumor	09HP-44	3p21.31	49065770	plus	1801	minus	-	IMPDH2	intron	LM-PCR
126	Non-tumor	09HP-44	6q22.1	117022177	minus	1826	plus	-	KPNA5	intron	Alu-PCR
127	Non-tumor	09HP-44	16q23.1	74529079	minus	1798	plus	-	GLG1	intron	Alu-PCR
128	Non-tumor	09HP-57	1p13.3	109497229	plus	1523	plus	-	CLCC1	intron	Alu-PCR
129	Non-tumor	09HP-60	21q22.3	44256121	minus	1332	plus	-	WDR4	<10kb	Alu-PCR
130	Non-tumor	09HP-60	3q26.33	182599281	minus	1794	plus	-	ATP11B	intron	Alu-PCR
131	Non-tumor	09HP-60	18p11.32	12062	plus	1623	minus	-	ROCK1P1	50-100kb	LM-PCR
132	Non-tumor	09HP-60	4q13.3	74248035	minus	1826	plus	-	ALB	10-50kb	LM-PCR
133	Non-tumor	09HP-60	8p23.1	9128103	minus	1823	minus	-	-	0-100kb	LM-PCR
134	Non-tumor	09HP-60	3q21.3	127809485	plus	1786	minus	-	RUVBL1	intron	LM-PCR
135	Non-tumor	09HP-61	6q27	169471300	minus	1635	plus	-	-	0-100kb	LM-PCR
136	Non-tumor	09HP-62	6q13	75429045	plus	1819	plus	-	-	0-100kb	Alu- PCR LM-PCR
137	Non-tumor	09HP-62	4q31.1	155504217	minus	1822	minus	-	FGA	<10kb	LM-PCR
138	Non-tumor	09HP-62	Xp22.2	11223526	minus	1845	minus	-	ARHGAP6	intron	LM-PCR
139	Non-tumor	09HP-62	2p12	81943431	plus	1823	plus	Del (1635-1643 & 1742-1746 )	-	0-100kb	LM-PCR
140	Non-tumor	09HP-62	8p11.23	37224236	plus	1819	plus	-	-	0-100kb	LM-PCR
141	Non-tumor	09HP-62	1p34.3	36757860	minus	1842	minus	-	THRAP3	intron	LM-PCR
142	Non-tumor	09HP-62	11q24.2	126047081	plus	1794	minus	-	FAM118B	10-50kb	LM-PCR
143	Non-tumor	09HP-62	13q34	111180761	minus	1827	minus	-	RAB20	intron	Alu-PCR
144	Non-tumor	09HP-64	5p14.1	26230235	plus	1910	plus	-	-	0-100kb	LM-PCR
145	Non-tumor	09HP-64	4p16.3	1737563	plus	1614	plus	-	TACC3	intron	Alu-PCR
146	Non-tumor	09HP-64	2q35	216250946	plus	1747	plus	-	FN1	intron	Alu-PCR
147	Non-tumor	09HP-65	6q25.3	156716036	plus	1781	plus	-	-	0-100kb	LM-PCR
148	Non-tumor	09HP-65	4q35.2	187153985	plus	1819	minus	-	KLkb1	intron	Alu-PCR
149	Non-tumor	09HP-65	2q35	216264921	plus	1819	minus	-	FN1	intron	Alu-PCR
150	Non-tumor	09HP-67	16q21	64966651	minus	1822	plus	-	CDH11	10-50kb	Alu-PCR
151	Non-tumor	09HP-68	2q35	216297676	minus	1834	minus	-	FN1	intron	Alu-PCR
152	Non-tumor	09HP-68	20q11.22	32986825	plus	1826	minus	-	ITCH	intron	Alu-PCR
153	Non-tumor	09HP-68	17q11.2	31060524	plus	1756	plus	-	MYO1D	intron	LM-PCR
154	Non-tumor	09HP-68	2q35	216297676	minus	1825	plus	-	FN1	intron	LM-PCR
155	Non-tumor	09HP-68	5q31.2	137882222	minus	1814	plus	-	HSPA9	<10kb	Alu-PCR
156	Non-tumor	09HP-68	1p31.1	70716136	minus	1576	plus	-	SRSF11	intron	Alu-PCR
157	Non-tumor	09HP-68	2q35	216293166	plus	1838	minus	-	FN1	intron	LM-PCR
158	Non-tumor	09HP-68	6q24.1	139815988	plus	1798	plus	-	LOC645434	10-50kb	Alu-PCR
159	Non-tumor	09HP-70	2q35	216293284	plus	1838	minus	-	FN1	intron	LM-PCR
160	Non-tumor	09HP-70	9p13.2 8P21.1	28111291	minus	1834	minus	-	PNOC	50-100kb	LM-PCR
161	Non-tumor	09HP-70	15q25.1	81194935	minus	1789	plus	-	KIAA1199	intron	LM-PCR
162	Non-tumor	09HP-70	20q13.33	59388030	minus	1819	minus	-	-	0-100kb	LM-PCR
163	Non-tumor	09HP-70	5q14.1	80163572	minus	1818	minus	-	MSH3	intron	LM-PCR
164	Non-tumor	09HP-70	10p11.21	35134492	plus	1701	plus	-	PARD3	10-50kb	Alu-PCR
165	Non-tumor	09HP-73	11q14.3	88936794	plus	1796	minus	-	TYR	intron	LM-PCR
166	Non-tumor	09HP-73	10p15.3	2930168	minus	1790	minus	-	-	0-100kb	LM-PCR
167	Non-tumor	09HP-73	6q16.3	104406882	minus	1818	minus	-	-	0-100kb	LM-PCR
168	Non-tumor	09HP-73	7p22.1	7213293	minus	1433	plus	-	C1GALT1	<10kb	Alu-PCR
169	Non-tumor	09HP-73	1q32.1	199248942	minus	1782	plus	Del (1620-1625)	-	0-100kb	Alu-PCR
170	Non-tumor	09HP-73	3q13.13	109526213	plus	1842	minus	-	-	0-100kb	Alu-PCR
171	Non-tumor	09HP-73	1q32.1	203022097	plus	1818	minus	Ins(CGTGAA) at 1618	PPFIA4	intron	Alu-PCR
172	Non-tumor	09HP-74	10p12.1	24839125	plus	1818	plus	-	KIAA1217	<10kb	Alu-PCR
173	Non-tumor	09HP-74	2q36.3	230315084	minus	1777	minus	-	DNER	intron	Alu-PCR
174	Non-tumor	09HP-74	2q32.2	194378211	plus	1818	minus	-	-	0-100kb	Alu-PCR
175	Non-tumor	09HP-74	19p13.3	3072886	minus	1824	minus	-	AES	<10kb	Alu-PCR
176	Non-tumor	09HP-74	6p21.31	35595968	minus	1842	plus	Ins (1842-1918) at 1859	FkbP5	intron	Alu-PCR
177	Non-tumor	09HP-74	6p21.2	39784989	plus	1825	minus	-	DAAM2	intron	Alu-PCR
178	Non-tumor	09HP-75	19q13.32	46372497	minus	1768	plus	-	FOXA3	intron	Alu-PCR
179	Non-tumor	09HP-75	2q37.1	235343120	plus	1731	plus	Ins (GTCCAAGAGTCCTCTTATGTAAGA) at 1647	ARL4C	50-100kb	Alu-PCR
180	Non-tumor	09HP-75	12p11.23	27136775	plus	1790	plus	-	TM7SF3	intron	Alu-PCR
181	Non-tumor	325P	10p12.33	18446090	minus	1827	plus	-	CACNB2	intron	Alu-PCR
182	Non-tumor	325P	1q21.2	150269757	plus	1815	plus	-	MRPS21	intron	Alu-PCR
183	Non-tumor	331p	16p12.1	27614409	minus	1818	plus	-	KIAA0556	intron	Alu-PCR
184	Non-tumor	331p	2p12	75904474	minus	1711	minus	-	C2orf3	intron	LM-PCR
185	Non-tumor	331p	6q25.3	160544973	minus	415	plus	Ins(415-436 ) at 1509	SLC22A1	intron	LM-PCR
186	Non-tumor	336p	8p23.1	8941214	plus	1822	plus	-	PPP1R3B	50-100kb	Alu-PCR
187	Non-tumor	336p	5p15.31	9437224	plus	1812	minus	-	SEMA5A	exon	LM-PCR
188	Non-tumor	336p	7q22.1	99618017	minus	1791	plus	-	ZKSCAN1	intron	LM-PCR
189	Non-tumor	337P	17p11.2	20673103	plus	1819	plus	-	CCDC144NL	50-100kb	Alu-PCR
190	Non-tumor	337P	8p22	18556593	plus	1632	plus	-	PSD3	intron	LM-PCR
191	Non-tumor	337P	21q21.33	47958194	minus	1628	minus	-	DIP2A	intron	LM-PCR
192	Non-tumor	339P	8p23.2	3679736	minus	1826	plus	-	CSMD1	intron	Alu-PCR
193	Non-tumor	339P	1p36.22	10126993	plus	1354	plus	-	UBE4B	intron	Alu-PCR
194	Non-tumor	339P	13q34	113916007	plus	1782	plus	-	CUL4A	intron	Alu-PCR
195	Non-tumor	339P	5q31.3	141209672	plus	1465	minus	-	PCDH1	10-50kb	Alu-PCR
196	Non-tumor	339P	8q13.2	3679442	plus	1529	plus	-	CSMD1	intron	LM-PCR
197	Non-tumor	339P	11q23.2	113977215	plus	1811	plus	Del (1720-1723)	ZBTB16	intron	LM-PCR
198	Non-tumor	339P	22q12.2	31902909	plus	1644	plus	-	SFI1	intron	LM-PCR
199	Non-tumor	348P	2q33.2	204436340	minus	1760	plus	-	RAPH1	10-50kb	Alu-PCR
200	Non-tumor	348P	11q25	133488073	minus	1843	minus	-	OPCML	50-100kb	LM-PCR
201	Non-tumor	350P	4q22.1	93362013	plus	1846	minus	-	GRID2	intron	LM-PCR
202	Non-tumor	197P	Xq26.2	133498156	plus	1772	plus	-	PHF6	0-10kb	Alu-PCR
203	Non-tumor	197P	2p23.2	29792372	minus	1825	minus	-	ALK	intron	LM-PCR
204	Non-tumor	197P	4q22.2	94731754	plus	1834	minus	-	GRID2	10-50kb	LM-PCR
205	Non-tumor	197P	16q22.3	73562620	minus	1806	plus	-	-	0-100kb	LM-PCR
206	Non-tumor	197P	21q21.1	22758592	plus	1604	plus	-	NCAM2	intron	LM-PCR
207	Non-tumor	414P	15q21.3	57550070	plus	1828	minus	-	TCF12	intron	Alu-PCR
208	Non-tumor	414P	1q31.1	188267331	minus	1824	minus	-	-	0-100kb	LM-PCR
209	Non-tumor	414P	12q21.1	75332295	plus	1836	minus	-	-	0-100kb	LM-PCR
210	Non-tumor	414P	5q15	98036772	minus	1599	plus	-	-	0-100kb	LM-PCR
211	Non-tumor	414P	2q35	216291241	plus	1842	minus	-	FN1	intron	LM-PCR
212	Non-tumor	432P	14q31.3	88387716	minus	1801	minus	-	GALC	10-50kb	LM-PCR
213	Non-tumor	432P	11q12.1	58496078	minus	1883	plus	-	GLYAT	intron	LM-PCR
214	Non-tumor	432P	1p32.3	52892237	plus	1801	minus	-	ZCCHC11	intron	LM-PCR
215	Non-tumor	432P	2p16.1	55810423	plus	1684	plus	-	SMEK2	intron	LM-PCR
216	Non-tumor	432P	1q23.3	165493883	minus	1643	minus	-	LOC400794	intron	LM-PCR
217	Non-tumor	432P	2p16.1	55810492	plus	1750	plus	-	-	0-100kb	LM-PCR
218	Non-tumor	432P	18q11.2	21942919	plus	1831	minus	-	OSBPL1A	intron	LM-PCR
219	Non-tumor	432P	2p15.1	11218239	plus	1756	plus	-	PQLC3	50-100kb	LM-PCR
220	Non-tumor	432P	9q33.1	121370311	minus	1838	minus	-	-	0-100kb	LM-PCR
221	Non-tumor	432P	12q24.31	121708445	plus	1799	plus	Del (1756-1772)	CAMKK2	intron	LM-PCR
222	Non-tumor	508P	16q22.1	66920444	minus	1617	plus	-	PDP2	exon	LM-PCR
223	Non-tumor	508P	19q13.12	35748272	plus	1828	minus	-	LSR	intron	LM-PCR
224	Non-tumor	509P	18q21.31	56099830	minus	1818	minus	-	NEDD4L	10-50kb	LM-PCR
225	Non-tumor	509P	22q13.1	38297565	minus	1768	plus	-	MICALL1	0-10kb	LM-PCR
226	Non-tumor	535P	11p11.2	46777166	minus	1695	plus	-	CKAP5	intron	Alu-PCR
227	Non-tumor	535P	6q12	67844513	plus	1826	plus	-	-	0-100kb	LM-PCR
228	Non-tumor	571P	14q11.2	24556261	plus	1545	plus	-	PCK2	0-10kb	LM-PCR
229	Non-tumor	571P	14q23.3	64914527	plus	1829	minus	-	MTHFD1	intron	LM-PCR
230	Non-tumor	571P	2q37.2	237248683	plus	1837	minus	-	IQCA1	intron	LM-PCR
231	Non-tumor	571P	13q31.1	79629589	plus	1789	plus	-	-	0-100kb	LM-PCR
232	Non-tumor	585P	12q15	68339190	plus	1823	minus	-	-	0-100kb	LM-PCR
233	Non-tumor	585P	8q24.23	138952687	plus	1774	plus	-	-	0-100kb	LM-PCR
234	Tumor	09H-2	US	ND	ND	1808	plus	-	ND	0-100kb	Alu-PCR
235	Tumor	09H-2	US	ND	ND	1505	plus	-	ND	0-100kb	Alu-PCR
236	Tumor	09H-7	US	ND	ND	1802	plus	-	ND	0-100kb	LM-PCR
237	Tumor	09H-24	US	ND	ND	1820	minus	Del (1754-1773)	ND	0-100kb	LM-PCR
238	Tumor	09H-27	US	ND	ND	1702	plus	-	ND	0-100kb	Alu-PCR
239	Tumor	09H-42	US	ND	ND	1815	plus	-	ND	0-100kb	Alu-PCR
240	Tumor	09H-58	US	ND	ND	1826	minus	-	ND	0-100kb	Alu-PCR
241	Tumor	09H-68	US	ND	ND	1501	minus	-	ND	0-100kb	LM-PCR
242	Tumor	336C	US	ND	ND	1698	plus	-	ND	0-100kb	LM-PCR
243	Tumor	337c	US	ND	ND	1750	plus	-	ND	0-100kb	LM-PCR
244	Tumor	339C	US	ND	ND	1604	plus	-	ND	0-100kb	Alu-PCR
245	Tumor	339C	US	ND	ND	1792	plus	-	ND	0-100kb	Alu-PCR
246	Tumor	339C	US	ND	ND	1552	plus	-	ND	0-100kb	LM-PCR
247	Tumor	351C	US	ND	ND	1698	plus	-	ND	0-100kb	LM-PCR
248	Tumor	197C	RS	ND	ND	1747	plus	-	ND	0-100kb	LM-PCR
249	Tumor	197C	US	ND	ND	1783	plus	-	ND	0-100kb	LM-PCR
250	Tumor	508C	RS	ND	ND	1847	minus	-	ND	0-100kb	LM-PCR
251	Tumor	571C	US	ND	ND	1704	plus	-	ND	0-100kb	LM-PCR
252	Tumor	571C	US	ND	ND	1595	plus	-	ND	0-100kb	Alu-PCR
253	Tumor	585C	US	ND	ND	1605	plus	-	ND	0-100kb	Alu-PCR
254	Non-tumor	09HP-6	US	ND	ND	1726	minus	-	ND	0-100kb	Alu-PCR
255	Non-tumor	09HP-10	US	ND	ND	1642	plus	-	ND	0-100kb	LM-PCR
256	Non-tumor	09HP-23	US	ND	ND	1819	plus	Ins(1866-1809) at 1440	ND	0-100kb	Alu-PCR
257	Non-tumor	09HP-32	US	ND	ND	1736	plus	-	ND	0-100kb	Alu-PCR
258	Non-tumor	09HP-38	US	ND	ND	1820	plus	Del (1765-1773)	ND	0-100kb	Alu-PCR
259	Non-tumor	09HP-44	US	ND	ND	1825	minus	-	ND	0-100kb	Alu-PCR
260	Non-tumor	09HP-57	US	ND	ND	1785	plus	-	ND	0-100kb	Alu-PCR
261	Non-tumor	09HP-57	US	ND	ND	1815	minus	-	ND	0-100kb	Alu-PCR
262	Non-tumor	09HP-60	US	ND	ND	1825	minus	-	ND	0-100kb	Alu-PCR
263	Non-tumor	09HP-60	US	ND	ND	1819	plus	Del (1751-1776)	ND	0-100kb	Alu-PCR
264	Non-tumor	09HP-61	US	ND	ND	1448	plus	-	ND	0-100kb	Alu-PCR
265	Non-tumor	09HP-64	US	ND	ND	1819	plus	-	ND	0-100kb	Alu-PCR
266	Non-tumor	09HP-64	US	ND	ND	1769	plus	-	ND	0-100kb	LM-PCR
267	Non-tumor	09HP-65	US	ND	ND	1875	plus	-	ND	0-100kb	Alu-PCR
268	Non-tumor	09HP-67	US	ND	ND	1819	plus	-	ND	0-100kb	Alu-PCR
269	Non-tumor	09HP-68	US	ND	ND	1821	minus	-	ND	0-100kb	Alu-PCR
270	Non-tumor	09HP-73	US	ND	ND	1782	plus	Del (1620-1625)	ND	0-100kb	Alu-PCR
271	Non-tumor	09HP-73	US	ND	ND	1821	plus	-	ND	0-100kb	Alu-PCR
272	Non-tumor	331p	US	ND	ND	1703	plus	-	ND	0-100kb	Alu-PCR
273	Non-tumor	331p	US	ND	ND	1847	minus	-	ND	0-100kb	LM-PCR
274	Non-tumor	336p	US	ND	ND	1782	plus	-	ND	0-100kb	LM-PCR
275	Non-tumor	337P	US	ND	ND	1592	plus	-	ND	0-100kb	Alu-PCR
276	Non-tumor	337P	US	ND	ND	1809	plus	-	ND	0-100kb	Alu-PCR
277	Non-tumor	337P	US	ND	ND	3075	plus	Ins(2855-3075) at 1817	ND	0-100kb	LM-PCR
278	Non-tumor	339P	US	ND	ND	2784	plus	Ins (2864 -2784) at 1736	ND	0-100kb	Alu-PCR
279	Non-tumor	339P	US	ND	ND	1698	plus	-	ND	0-100kb	LM-PCR
280	Non-tumor	350P	US	ND	ND	1698	plus	-	ND	0-100kb	LM-PCR
281	Non-tumor	359P	US	ND	ND	1846	minus	-	ND	0-100kb	LM-PCR
282	Non-tumor	197P	US	ND	ND	1739	plus	-	ND	0-100kb	LM-PCR
283	Non-tumor	414P	US	ND	ND	1806	plus	-	ND	0-100kb	Alu-PCR
284	Non-tumor	508P	US	ND	ND	1752	plus	-	ND	0-100kb	LM-PCR
285	Non-tumor	509P	US	ND	ND	1765	plus	-	ND	0-100kb	LM-PCR
286	Non-tumor	509P	US	ND	ND	1603	plus	-	ND	0-100kb	Alu-PCR
287	Non-tumor	197P	US	ND	ND	1814	minus	-	ND	0-100kb	LM-PCR
US: unidentified sequence; RS: repetitive sequence; ND: not determined; Del: delete; Ins: insert.
